# Supplementary material for: Streptococcus agalactiae clones infecting humans were selected and fixed through the extensive use of tetracycline
Source: PubMed Central journal article supplement (PMC4538795; doi:10.1038/ncomms5544), 2014-08-04
Supplement: NIHMS64295-supplement-Supplementary_data.pdf [file NIHMS64295-supplement-Supplementary_data.pdf]

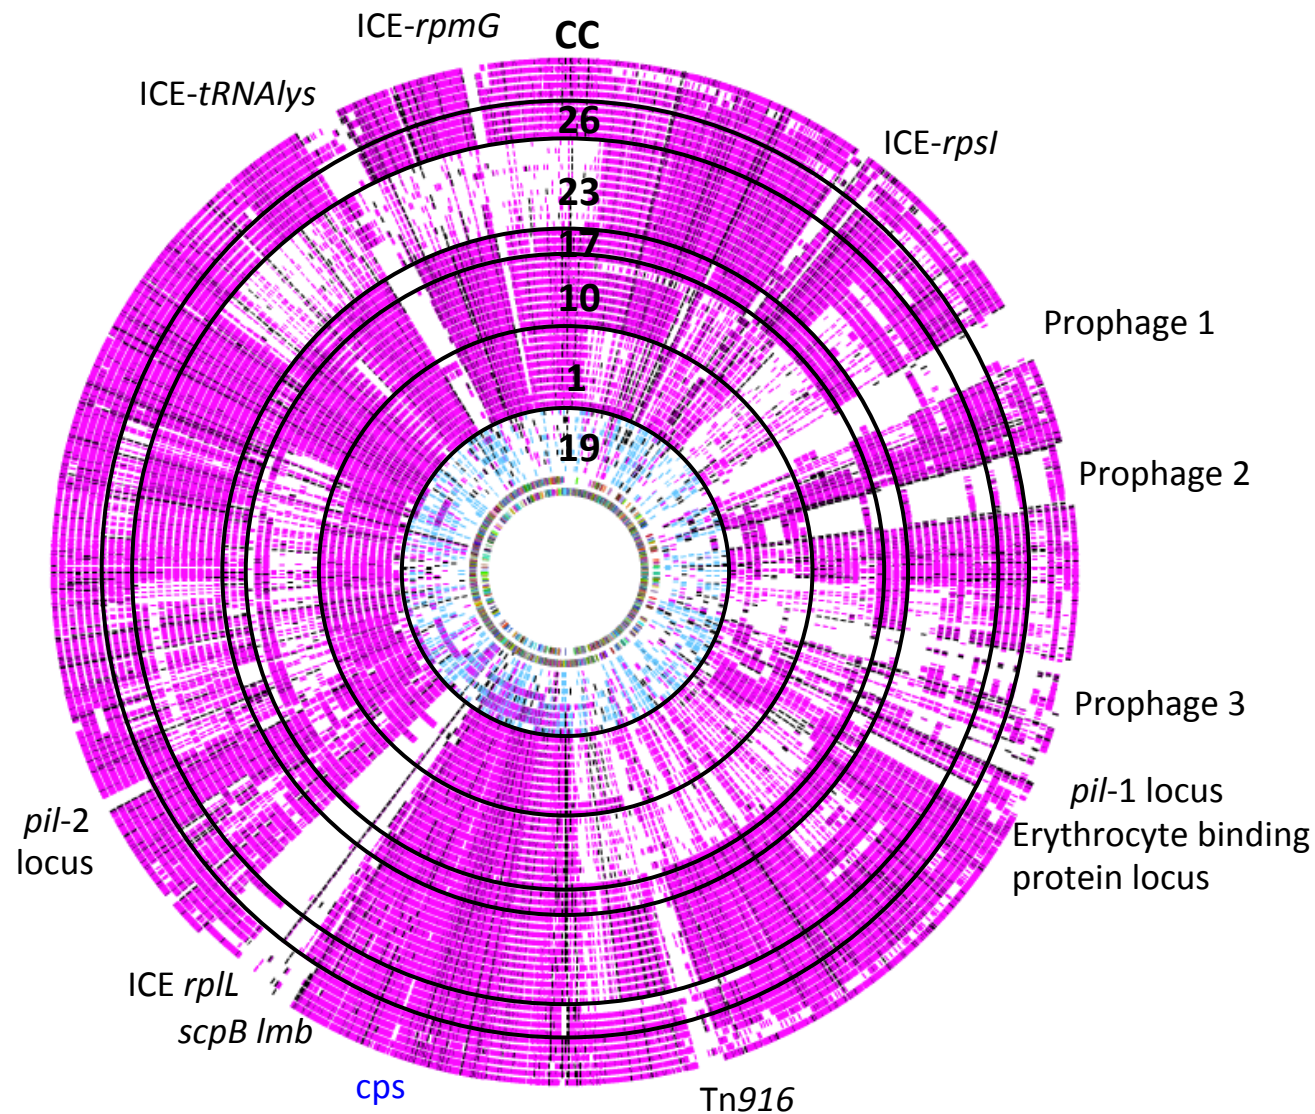

**Supplementary Fig. 1:** *Distribution of SNPs and recombination across 52 representative GBS isolates.* Circular view of SNPs across the whole genome. Isolates were selected to represent all major recombination events identified within each CC. The reference genome is the serotype III ST19 strain RBH11. Genomic islands from the reference genome are indicated in the outside circle as well as the capsular *cps* locus. Isolates were grouped by CCs delineated by black circles and their number indicated. SNPs are indicated by short lines on each circle. The variation in the SNP density reflects recombined regions. The figure was generated by using the SyntView software at [http://genopole.pasteur.fr/SyntView/flash/Streptococcus\\_agalactiae](http://genopole.pasteur.fr/SyntView/flash/Streptococcus_agalactiae).

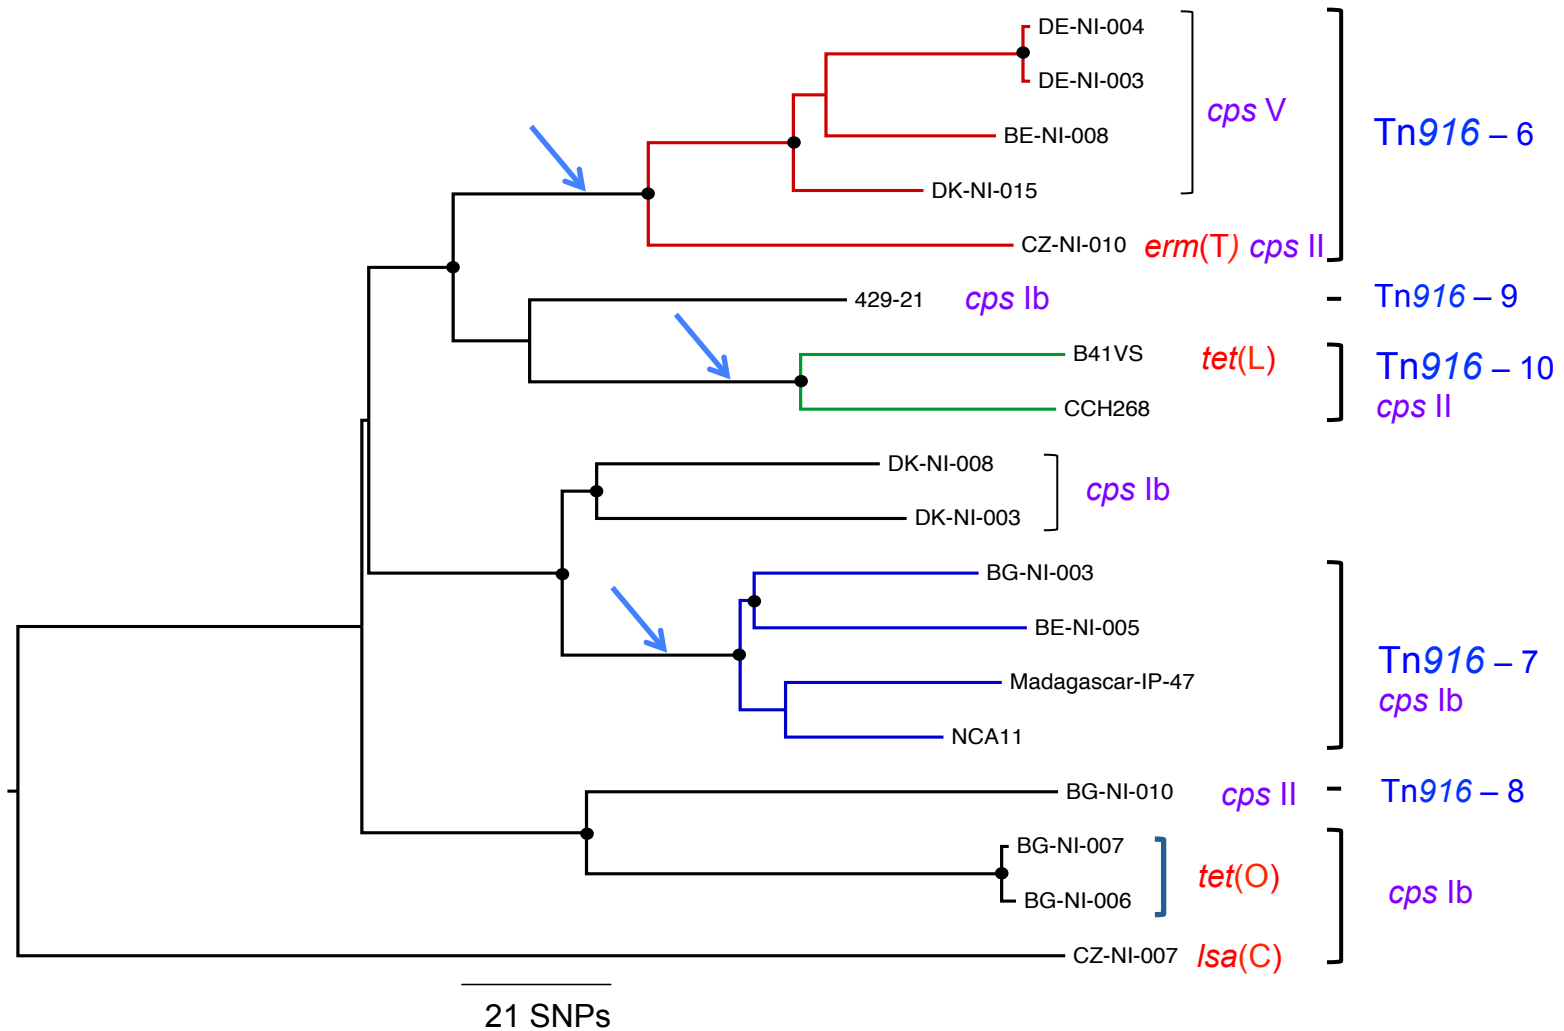

**Supplementary Fig. 2: Phylogeny of clonal complex CC10.** ML phylogeny from the alignment of pseudosequences of the 971 polymorphic positions in 1069 interrogated kbases. The previously defined clonal complexes 6, 8 and 10 were analysed together as they are closely related and named here CC10. The five independent Tn916 or Tn5801 insertions are indicated in blue and numbers from 6 to 10 refer to their description in Table 4. The three TcR lineages with more than one isolate are coloured in red, green and blue. Serotypes (*cps*) Ib, II and V are indicated in violet. Antibiotic resistance genes other than *tet*(M) are indicated in red. Nodes with >90% bootstrap support are indicated by black dots.

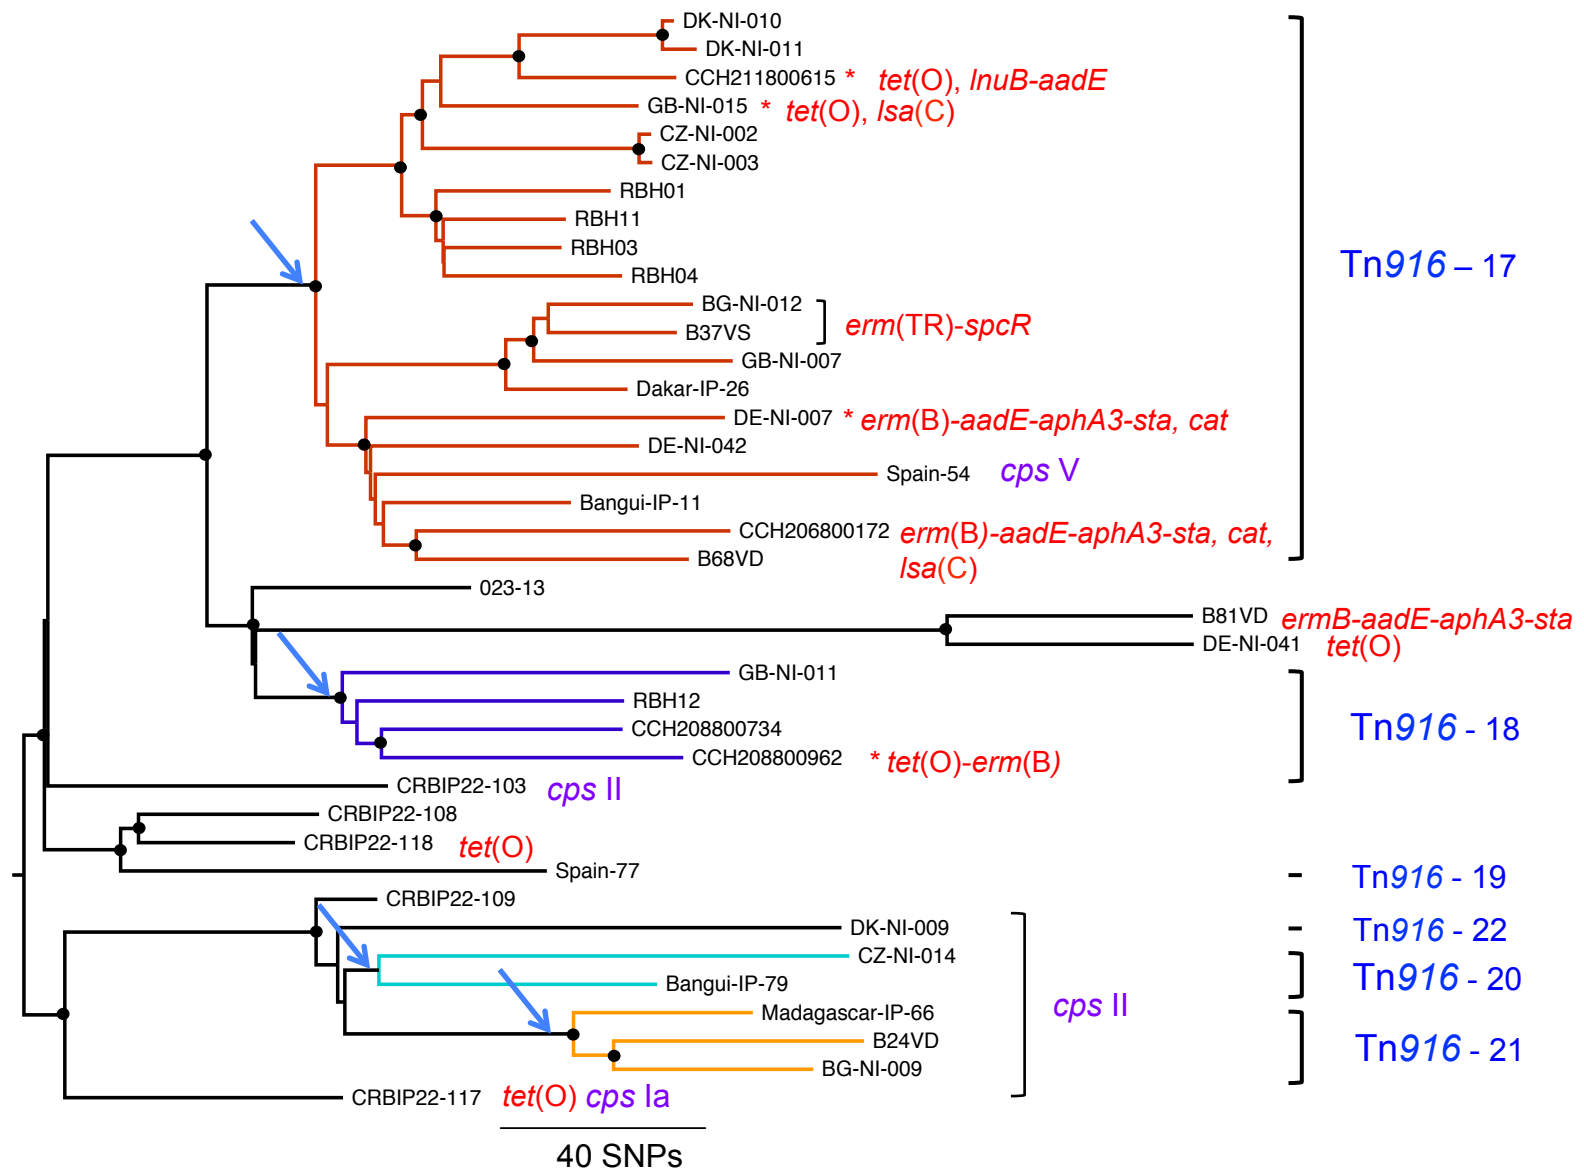

**Supplementary Fig. 3: Phylogeny of clonal complex CC19.** ML phylogeny from the alignment of pseudosequences of the 2016 polymorphic positions in 1427 interrogated kbases. The six independent Tn916 or Tn5801 insertions are indicated in blue and numbers from 17 to 22 refer to their description in Table 4. The four TcR lineages with more than one isolate are coloured in red, blue, turquoise and orange. Four isolates indicated by a star are predicted to have lost Tn916. The majority of the isolates are of serotype III. Other serotypes (*cps Ia*, II and V) are indicated in violet. Antibiotic resistance genes other than *tet(M)* are indicated in red. Nodes with >90% bootstrap support are indicated by black dots.

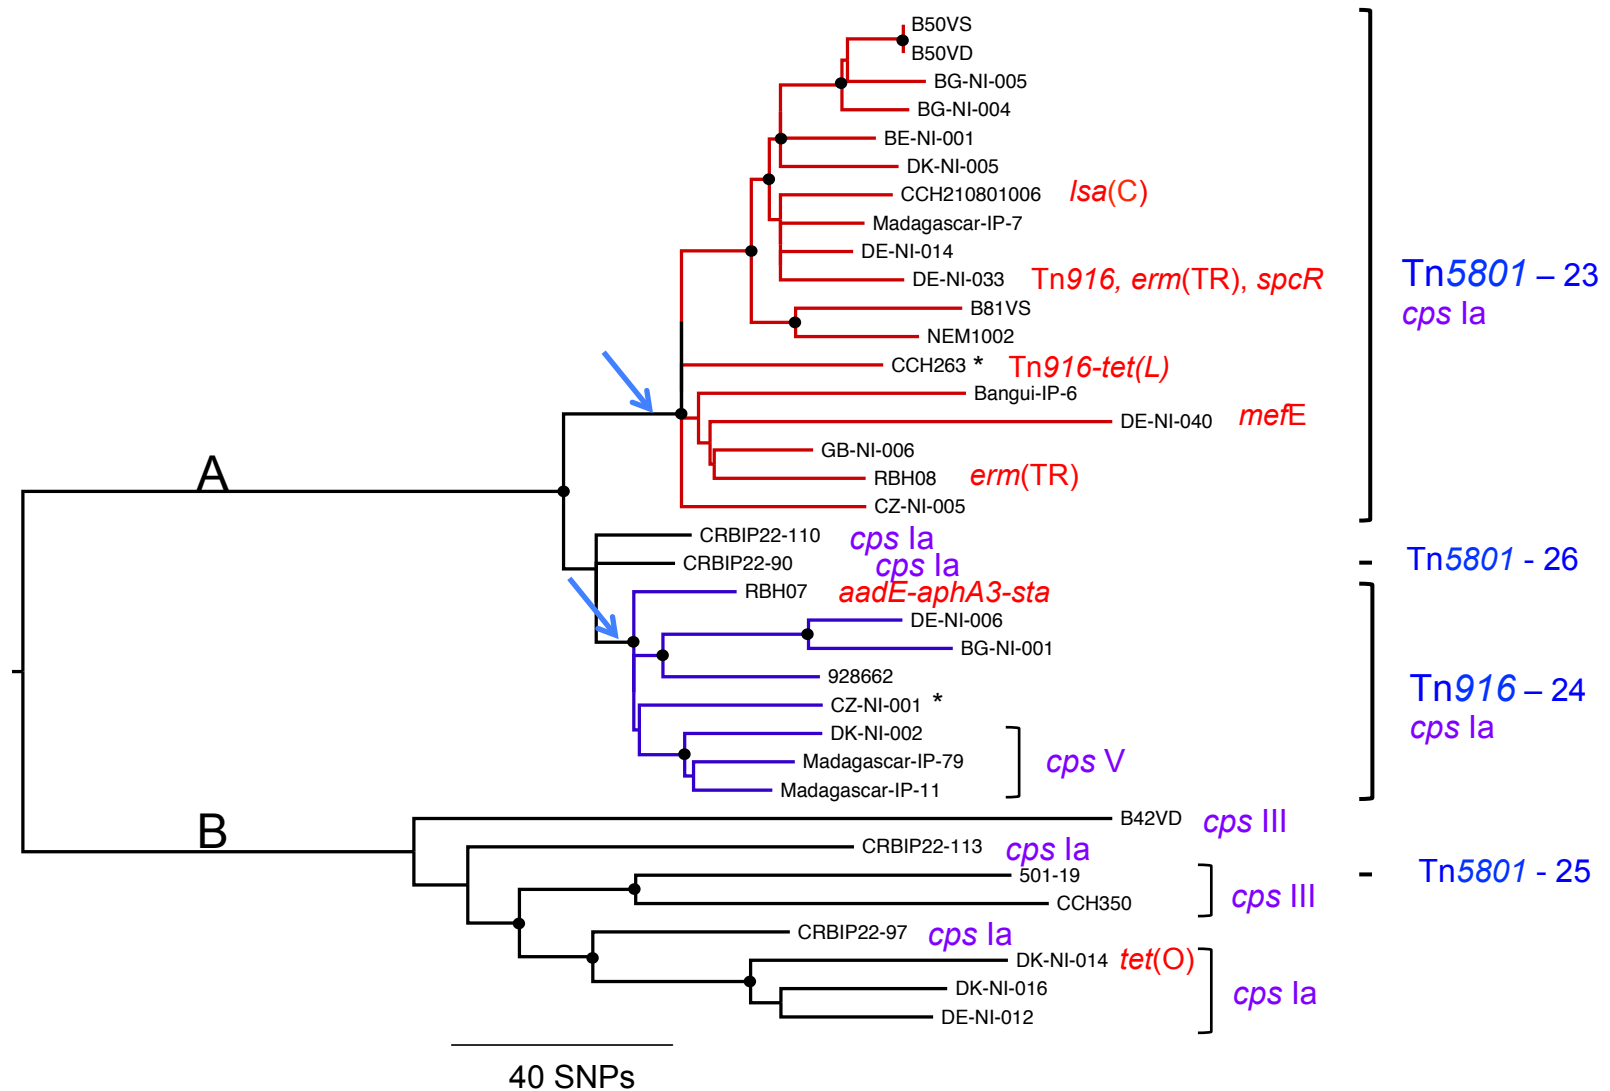

**Supplementary Fig. 4: Phylogeny of clonal complex CC23.** ML phylogeny from the alignment of pseudosequences of the 1329 polymorphic positions in 980 interrogated kbases. The four independent Tn916 or Tn5801 insertions are indicated in blue and numbers from 23 to 26 refer to their description in Table 4. The two TcR lineages with more than one isolate are coloured in red and blue. Serotypes (*cps*) Ia, III and V are indicated in violet. The two major ST23 subdivisions A and B were previously identified following the sequencing of 15 genes. Cluster A comprises mostly human *cps* type Ia isolates. Cluster B were described to correspond mostly to bovine *cps* type III isolates, here exemplified by strain 501-19. However, most human isolates belonging to cluster B analysed here are of serotype Ia indicative of different events of capsular switches. Antibiotic resistance genes other than *tet(M)* are indicated in red. Nodes with >90% bootstrap support are indicated by black dots.



**Supplementary Fig. 4: Phylogeny of clonal complex CC23.** ML phylogeny from the alignment of pseudosequences of the 1329 polymorphic positions in 980 interrogated kbases. The four independent Tn916 or Tn5801 insertions are indicated in blue and numbers from 23 to 26 refer to their description in Table 4. The two TcR lineages with more than one isolate are coloured in red and blue. Serotypes (*cps*) Ia, III and V are indicated in violet. The two major ST23 subdivisions A and B were previously identified following the sequencing of 15 genes. Cluster A comprises mostly human *cps* type Ia isolates. Cluster B were described to correspond mostly to bovine *cps* type III isolates, here exemplified by strain 501-19. However, most human isolates belonging to cluster B analysed here are of serotype Ia indicative of different events of capsular switches. Antibiotic resistance genes other than *tet*(M) are indicated in red. Nodes with >90% bootstrap support are indicated by black dots.

Supplementary Table 1

| CC  | Strain Name  | Geographical origin | Year | Host  | Clinical origin <sup>s</sup> | CPS type | ST    | Antibiotic resistance gene(s) | TcR ICE Group | Read length | Sample accession number | Study accession number |
|-----|--------------|---------------------|------|-------|------------------------------|----------|-------|-------------------------------|---------------|-------------|-------------------------|------------------------|
| CC1 | DE-NI-022    | Germany             | 2009 | Human | NInv-EOD                     | V        | ST387 | <i>tet(M)</i>                 | G1-Tn916      | PE 2 x 75   | ERS039659               | ERP000746              |
| CC1 | BG-NI-011    | Bulgaria            | 2010 | Human | NCarriage                    | V        | ST1   | <i>tet(M)</i>                 | G1-Tn916      | PE 2 x 75   | ERS039644               | ERP000746              |
| CC1 | IT-NI-028    | Italy               | 2009 | Human | NInv-EOD                     | V        | ST1   | <i>tet(M)</i>                 | G1-Tn916      | PE 2 x 75   | ERS039675               | ERP000746              |
| CC1 | GB-NI-009    | Great Britain       | 2010 | Human | NInv-EOD                     | V        | ST1   | <i>tet(M)</i>                 | G1-Tn916      | PE 2 x 75   | ERS039703               | ERP000746              |
| CC1 | CZ-NI-006    | Czech Republic      | 2008 | Human | NCarriage                    | V        | ST1   | <i>tet(M) erm(TR)</i>         | G1-Tn916      | PE 2 x 75   | ERS039687               | ERP000746              |
| CC1 | CZ-NI-008    | Czech Republic      | 2008 | Human | NCarriage                    | V        | ST1   | <i>tet(M)</i>                 | G1-Tn916      | PE 2 x 75   | ERS039689               | ERP000746              |
| CC1 | CZ-NI-009    | Czech Republic      | 2008 | Human | NCarriage                    | V        | ST1   | <i>tet(M)</i>                 | G1-Tn916      | PE 2 x 75   | ERS039690               | ERP000746              |
| CC1 | B09PS        | Australia           | 2008 | Human | Carriage                     | V        | ST1   | <i>tet(M)</i>                 | G1-Tn916      | PE 2 x 75   | ERS046905               | ERP000746              |
| CC1 | RBH05        | Australia           | 2008 | Human | Carriage                     | V        | ST1   | <i>tet(M)</i>                 | G1-Tn916      | PE 2 x 75   | ERS046920               | ERP000746              |
| CC1 | RBH09        | Australia           | 2008 | Human | Carriage                     | V        | ST1   | <i>tet(M)</i>                 | G1-Tn916      | PE 2 x 75   | ERS046924               | ERP000746              |
| CC1 | CCH206800162 | France              | 2006 | Human | AlnvD                        | V        | ST1   | <i>tet(M)</i>                 | G1-Tn916      | 110         | ERS337526               | PRJEB4456              |
| CC1 | CCH208800538 | France              | 2008 | Human | InvD                         | V        | ST1   | <i>tet(M) erm(TR)</i>         | G1-Tn916      | 110         | ERS337529               | PRJEB4456              |
| CC1 | p5465        | Germany             | 1997 | Dog   | Carriage                     | V        | ST1   | <i>tet(M)</i>                 | G1-Tn916      | 51          | ERS337455               | PRJEB4456              |
| CC1 | IT-NI-0031   | Italy               | 2010 | Human | NInv-EOD                     | V        | ST1   | <i>erm(TR)</i>                | G1-Tn916      | PE 2 x 75   | ERS039676               | ERP000746              |
| CC1 | DK-NI-012    | Denmark             | 2010 | Human | NInv-EOD                     | V        | ST1   | <i>tet(M) erm(B)</i>          | G1-Tn916      | PE 2 x 75   | ERS039627               | ERP000746              |
| CC1 | DK-NI-013    | Denmark             | 2010 | Human | NCarriage                    | V        | ST1   | <i>tet(M) erm(B)</i>          | G1-Tn916      | PE 2 x 75   | ERS039628               | ERP000746              |
| CC1 | DK-NI-022    | Denmark             | 2011 | Human | NInv-EOD                     | V        | ST1   | <i>tet(M) erm(B)</i>          | G1-Tn916      | PE 2 x 75   | ERS039634               | ERP000746              |
| CC1 | DE-NI-001    | Germany             | 2007 | Human | NInv-EOD                     | V        | ST1   | <i>tet(M) erm(B)</i>          | G1-Tn916      | PE 2 x 75   | ERS039648               | ERP000746              |
| CC1 | CZ-NI-004    | Czech Republic      | 2008 | Human | NCarriage                    | V        | ST1   | <i>tet(M) erm(B)</i>          | G1-Tn916      | PE 2 x 75   | ERS039685               | ERP000746              |
| CC1 | CZ-NI-015    | Czech Republic      | 2009 | Human | NInv-EOD                     | V        | ST1   | <i>tet(M) erm(B)</i>          | G1-Tn916      | PE 2 x 75   | ERS039694               | ERP000746              |
| CC1 | GB-NI-010    | Great Britain       | 2010 | Human | NInv-EOD                     | V        | ST1   | <i>tet(M) erm(B)</i>          | G1-Tn916      | PE 2 x 75   | ERS039704               | ERP000746              |
| CC1 | CZ-NI-013    | Czech Republic      | 2009 | Human | NCarriage                    | V        | ST1   | <i>tet(M) erm(B)</i>          | G1-Tn916      | PE 2 x 75   | ERS039692               | ERP000746              |
| CC1 | CCH239       | France              | 1998 | Human | urine                        | V        | ST1   | <i>tet(M) erm(B)</i>          | G1-Tn916      | 51          | ERS337453               | PRJEB4456              |
| CC1 | Bangui-IP-50 | C.A.F <sup>s</sup>  | 2006 | Human | NA                           | V        | ST1   | <i>tet(M) erm(B)</i>          | G1-Tn916      | 51          | ERS337451               | PRJEB4456              |

Supplementary Table 1

|      |                  |                       |      |        |             |    |                              |                             |           |           |           |           |
|------|------------------|-----------------------|------|--------|-------------|----|------------------------------|-----------------------------|-----------|-----------|-----------|-----------|
| CC1  | CCH208800262     | France                | 2008 | Human  | AlnvD       | V  | ST1                          | <i>tet(M) erm(B)</i>        | G1-Tn916  | 110       | ERS337528 | PRJEB4456 |
| CC1  | Bangui-IP-59     | C. A. F. <sup>5</sup> | 2007 | Human  | NA          | V  | ST1                          | <i>tet(M) erm(B)</i>        | G1-Tn916  | 51        | ERS337524 | PRJEB4456 |
| CC1  | Spain-IP-68      | Spain                 | 2005 | Human  | NA          | V  | ST1                          |                             | G1-Tn916  | 51        | ERS337437 | PRJEB4456 |
| CC1  | DK-NI-019        | Denmark               | 2010 | Human  | NCarriage   | IV | ST196                        | <i>tet(M)</i>               | G2-Tn916  | PE 2 x 75 | ERS039632 | ERP000746 |
| CC1  | CZ-NI-016        | Czech Republic        | 2010 | Human  | NInv-EOD    | IV | ST459-like <sup>#</sup>      | <i>tet(M) erm (TR) spcR</i> | G2-Tn916  | PE 2 x 75 | ERS039695 | ERP000746 |
| CC1  | CCH207800464     | France                | 2007 | Human  | NA          | IV | ST196                        | <i>tet(M)</i>               | G2-Tn916  | 101       | ERS337456 | PRJEB4456 |
| CC1  | CCH209800741     | France                | 2009 | Human  | AlnvD       | IV | ST196                        | <i>tet(M)</i>               | G2-Tn916  | 101       | ERS337457 | PRJEB4456 |
| CC1  | CCH210800418     | France                | 2010 | Human  | AlnvD       | IV | ST459                        | <i>tet(M) erm (TR) spcR</i> | G2-Tn916  | 101       | ERS337460 | PRJEB4456 |
| CC1  | CCH208800621     | France                | 2008 | Human  | Carriage    | IV | ST459                        | <i>tet(M) erm (TR) spcR</i> | G2-Tn916  | 101       | ERS337459 | PRJEB4456 |
| CC1  | RBH02            | Australia             | 2008 | Human  | Carriage    | IV | ST2                          | <i>tet(M)</i>               | G3-Tn5801 | PE 2 x 75 | ERS046917 | ERP000746 |
| CC1  | Bangui-IP-8      | C. A. F. <sup>5</sup> | 2007 | Human  | Carriage    | IV | ST2                          | <i>tet(M)</i>               | G4-Tn5801 | 101       | ERS337458 | PRJEB4456 |
| CC1  | DE-NI-010        | Germany               | 2008 | Human  | NInv-EOD    | II | ST2                          | <i>tet(M)</i>               | G5-Tn916  | PE 2 x 75 | ERS039653 | ERP000746 |
| CC1  | CCH330           | France                | 1998 | Human  | urine       | VI | ST1                          |                             |           | 51        | ERS337454 | PRJEB4456 |
| CC1  | CCH208800620     | France                | 2008 | Human  | Carriage    | V  | ST1                          | <i>Isa(C)</i>               |           | 110       | ERS337452 | PRJEB4456 |
| CC1  | Spain-IP-33      | Spain                 | 2005 | Bovine | Bovine milk | II | ST2-like <sup>&amp;</sup>    | <i>tet(O) aadE erm(B)</i>   |           | 51        | ERS337438 | PRJEB4456 |
| CC10 | DK-NI-015        | Denmark               | 2008 | Human  | NCarriage   | V  | ST10-like <sup>&amp;</sup>   | <i>tet(M)</i>               | G6-Tn5801 | PE 2 x 75 | ERS039630 | ERP000746 |
| CC10 | BE-NI-008        | Belgium               | 2010 | Human  | Carriage    | V  | ST10                         | <i>tet(M)</i>               | G6-Tn5801 | PE 2 x 75 | ERS039616 | ERP000746 |
| CC10 | DE-NI-003        | Germany               | 2008 | Human  | NInv-EOD    | V  | ST10-like <sup>#-&amp;</sup> | <i>tet(M)</i>               | G6-Tn5801 | PE 2 x 75 | ERS039649 | ERP000746 |
| CC10 | DE-NI-004        | Germany               | 2008 | Human  | NInv-EOD    | V  | ST10                         | <i>tet(M)</i>               | G6-Tn5801 | PE 2 x 75 | ERS039650 | ERP000746 |
| CC10 | CZ-NI-010        | Czech Republic        | 2009 | Human  | NCarriage   | II | ST10-like <sup>#</sup>       | <i>tet(M) erm(T)</i>        | G6-Tn5801 | PE 2 x 75 | ERS039691 | ERP000746 |
| CC10 | BE-NI-005        | Belgium               | 2010 | Human  | Carriage    | Ib | ST8                          | <i>tet(M)</i>               | G7-Tn916  | PE 2 x 75 | ERS039614 | ERP000746 |
| CC10 | BG-NI-003        | Bulgaria              | 2009 | Human  | NCarriage   | Ib | ST8                          | <i>tet(M)</i>               | G7-Tn916  | PE 2 x 75 | ERS039637 | ERP000746 |
| CC10 | Madagascar-IP-47 | Madagascar            | 2007 | Human  | Carriage    | Ib | ST8-like <sup>&amp;</sup>    | <i>tet(M)</i>               | G7-Tn916  | 110       | ERS337547 | PRJEB4456 |
| CC10 | NCA11            | New Caledonia         | 2003 | Human  | Carriage    | Ib | ST8-like <sup>&amp;</sup>    | <i>tet(M)</i>               | G7-Tn916  | 110       | ERS337535 | PRJEB4456 |
| CC10 | BG-NI-010        | Bulgaria              | 2009 | Human  | NCarriage   | II | ST12-like <sup>#-&amp;</sup> | <i>tet(M)</i>               | G8-Tn916  | PE 2 x 75 | ERS039643 | ERP000746 |

Supplementary Table 1

|      |           |                |      |        |                 |     |                              |                      |            |           |           |           |
|------|-----------|----------------|------|--------|-----------------|-----|------------------------------|----------------------|------------|-----------|-----------|-----------|
| CC10 | 429_21    | France         | 1983 | Bovine | Bovine Mastitis | Ib  | ST10                         | <i>tet(M)</i>        | G9-Tn916   | 51        | ERS337549 | PRJEB4456 |
| CC10 | B41VS     | Australia      | 2008 | Human  | Carriage        | II  | ST10-like <sup>&amp;</sup>   | <i>tet(M) tet(L)</i> | G10-Tn916  | PE 2 x 75 | ERS046928 | ERP000746 |
| CC10 | CCH268    | France         | 1998 | Human  | Sperm           | II  | ST10                         | <i>tet(M)</i>        | G10-Tn916  | 51        | ERS337542 | PRJEB4456 |
| CC10 | DK-NI-008 | Denmark        | 2009 | Human  | NCarriage       | Ib  | ST9-like <sup>#&amp;</sup>   |                      |            | PE 2 x 75 | ERS039623 | ERP000746 |
| CC10 | DK-NI-003 | Denmark        | 2009 | Human  | NCarriage       | Ib  | ST523-like <sup>#&amp;</sup> |                      |            | PE 2 x 75 | ERS039619 | ERP000746 |
| CC10 | BG-NI-006 | Bulgaria       | 2009 | Human  | NCarriage       | Ib  | ST12-like <sup>#</sup>       | <i>tet(O)</i>        |            | PE 2 x 75 | ERS039640 | ERP000746 |
| CC10 | BG-NI-007 | Bulgaria       | 2009 | Human  | NCarriage       | Ib  | ST12-like <sup>&amp;</sup>   | <i>tet(O)</i>        |            | PE 2 x 75 | ERS039641 | ERP000746 |
| CC10 | CZ-NI-007 | Czech Republic | 2008 | Human  | NCarriage       | Ib  | ST255-like <sup>#</sup>      | <i>lsa(C)</i>        |            | PE 2 x 75 | ERS039688 | ERP000746 |
| CC17 | DK-NI-007 | Denmark        | 2009 | Human  | NInv-EOD        | III | ST17-like <sup>#</sup>       | <i>tet(M)</i>        | G11-Tn5801 | PE 2 x 75 | ERS039622 | ERP000746 |
| CC17 | DK-NI-021 | Denmark        | 2009 | Human  | NCarriage       | III | ST17-like <sup>#</sup>       | <i>tet(M)</i>        | G11-Tn5801 | PE 2 x 75 | ERS039633 | ERP000746 |
| CC17 | BG-NI-002 | Bulgaria       | 2009 | Human  | NCarriage       | III | ST17-like <sup>#</sup>       | <i>tet(M)</i>        | G11-Tn5801 | PE 2 x 75 | ERS039636 | ERP000746 |
| CC17 | DK-NI-001 | Denmark        | 2009 | Human  | NCarriage       | III | ST17-like <sup>#</sup>       | <i>tet(M)</i>        | G11-Tn5801 | PE 2 x 75 | ERS039617 | ERP000746 |
| CC17 | DK-NI-004 | Denmark        | 2009 | Human  | NInv-EOD        | III | ST17-like <sup>#</sup>       | <i>tet(M)</i>        | G11-Tn5801 | PE 2 x 75 | ERS039620 | ERP000746 |
| CC17 | DE-NI-032 | Germany        | 2009 | Human  | NInv-EOD        | III | ST17-like <sup>#</sup>       | <i>tet(M)</i>        | G11-Tn5801 | PE 2 x 75 | ERS039660 | ERP000746 |
| CC17 | IT-NI-009 | Italy          | 2008 | Human  | NInv-EOD        | III | ST17-like <sup>#&amp;</sup>  | <i>tet(M)</i>        | G11-Tn5801 | PE 2 x 75 | ERS039670 | ERP000746 |
| CC17 | IT-NI-018 | Italy          | 2009 | Human  | NInv-EOD        | III | ST17-like <sup>#</sup>       | <i>tet(M)</i>        | G11-Tn5801 | PE 2 x 75 | ERS039672 | ERP000746 |
| CC17 | IT-NI-019 | Italy          | 2009 | Human  | NInv-EOD        | III | ST17-like <sup>#</sup>       | <i>tet(M)</i>        | G11-Tn5801 | PE 2 x 75 | ERS039673 | ERP000746 |
| CC17 | IT-NI-020 | Italy          | 2009 | Human  | NInv-EOD        | III | ST17-like <sup>#</sup>       | <i>tet(M)</i>        | G11-Tn5801 | PE 2 x 75 | ERS039674 | ERP000746 |
| CC17 | IT-NI-032 | Italy          | 2010 | Human  | NInv-EOD        | III | ST17-like <sup>#</sup>       | <i>tet(M)</i>        | G11-Tn5801 | PE 2 x 75 | ERS039677 | ERP000746 |
| CC17 | IT-NI-033 | Italy          | 2010 | Human  | NInv-EOD        | III | ST17-like <sup>#</sup>       | <i>tet(M)</i>        | G11-Tn5801 | PE 2 x 75 | ERS039678 | ERP000746 |
| CC17 | IT-NI-034 | Italy          | 2010 | Human  | NInv-EOD        | III | ST17-like <sup>#</sup>       | <i>tet(M)</i>        | G11-Tn5801 | PE 2 x 75 | ERS039679 | ERP000746 |
| CC17 | DE-NI-036 | Germany        | 2010 | Human  | NInv-EOD        | III | ST17-like <sup>#</sup>       | <i>tet(M)</i>        | G11-Tn5801 | PE 2 x 75 | ERS039662 | ERP000746 |
| CC17 | DE-NI-037 | Germany        | 2010 | Human  | NInv-EOD        | III | ST17-like <sup>#</sup>       | <i>tet(M)</i>        | G11-Tn5801 | PE 2 x 75 | ERS039663 | ERP000746 |
| CC17 | IT-NI-007 | Italy          | 2008 | Human  | NInv-EOD        | III | ST17-like <sup>#</sup>       | <i>tet(M)</i>        | G11-Tn5801 | PE 2 x 75 | ERS039668 | ERP000746 |
| CC17 | IT-NI-008 | Italy          | 2008 | Human  | NInv-EOD        | III | ST17-like <sup>#</sup>       | <i>tet(M)</i>        | G11-Tn5801 | PE 2 x 75 | ERS039669 | ERP000746 |



Supplementary Table 1

|      |              |                       |      |       |          |     |                             |                                                 |            |           |           |           |
|------|--------------|-----------------------|------|-------|----------|-----|-----------------------------|-------------------------------------------------|------------|-----------|-----------|-----------|
| CC17 | GB-NI-003    | Great Britain         | 2009 | Human | NInv-EOD | III | ST17-like <sup>#</sup>      | <i>tet</i> (M)                                  | G11-Tn5801 | PE 2 x 75 | ERS039698 | ERP000746 |
| CC17 | GB-NI-004    | Great Britain         | 2010 | Human | NInv-EOD | III | ST17-like <sup>#</sup>      | <i>tet</i> (M)                                  | G11-Tn5801 | PE 2 x 75 | ERS039699 | ERP000746 |
| CC17 | GB-NI-005    | Great Britain         | 2009 | Human | NInv-EOD | III | ST17-like <sup>#</sup><br>& | <i>tet</i> (M)                                  | G11-Tn5801 | PE 2 x 75 | ERS039700 | ERP000746 |
| CC17 | B15VD        | Australia             | 2008 | Human | Carriage | III | ST17                        |                                                 | G11-Tn5801 | PE 2 x 75 | ERS046906 | ERP000746 |
| CC17 | CCH208800879 | France                | 2008 | Human | NInv-LOD | III | ST17                        | <i>tet</i> (M)                                  | G11-Tn5801 | 101       | ERS337471 | PRJEB4456 |
| CC17 | CCH210800688 | France                | 2010 | Human | NInv-LOD | III | ST17                        | <i>tet</i> (M)                                  | G11-Tn5801 | 110       | ERS337491 | PRJEB4456 |
| CC17 | CCH210125551 | France                | 2010 | Human | Carriage | III | ST17                        | <i>tet</i> (M)                                  | G11-Tn5801 | 51        | ERS337478 | PRJEB4456 |
| CC17 | CCH208800031 | France                | 2008 | Human | NInv-LOD | III | ST17                        | <i>tet</i> (M)                                  | G11-Tn5801 | 51        | ERS337467 | PRJEB4456 |
| CC17 | CCH207800974 | France                | 2007 | Human | LOD      | III | ST17                        | <i>tet</i> (M) <i>tet</i> (O)<br><i>erm</i> (B) | G11-Tn5801 | 101       | ERS337466 | PRJEB4456 |
| CC17 | CCH206800391 | France                | 2006 | Human | NInv-LOD | III | ST17                        | <i>tet</i> (M)                                  | G11-Tn5801 | 110       | ERS337462 | PRJEB4456 |
| CC17 | CCH210150530 | France                | 2010 | Human | Carriage | III | ST17                        | <i>tet</i> (M)                                  | G11-Tn5801 | 51        | ERS337481 | PRJEB4456 |
| CC17 | CCH210800096 | France                | 2010 | Human | NInv-LOD | III | ST17                        | <i>tet</i> (M)                                  | G11-Tn5801 | 51        | ERS337488 | PRJEB4456 |
| CC17 | CCH210169151 | France                | 2010 | Human | Carriage | III | ST17                        | <i>tet</i> (M)                                  | G11-Tn5801 | 51        | ERS337485 | PRJEB4456 |
| CC17 | CCH208800438 | France                | 2008 | Human | NInv-LOD | III | ST17-like <sup>#</sup>      | <i>tet</i> (M)                                  | G11-Tn5801 | 51        | ERS337469 | PRJEB4456 |
| CC17 | CCH210160764 | France                | 2010 | Human | NInv-LOD | III | ST17                        | <i>tet</i> (M) <i>erm</i> (B)                   | G11-Tn5801 | 51        | ERS337484 | PRJEB4456 |
| CC17 | CCH209800522 | France                | 2009 | Human | NInv-LOD | III | ST17                        | <i>tet</i> (M)                                  | G11-Tn5801 | 51        | ERS337475 | PRJEB4456 |
| CC17 | CCH208800147 | France                | 2008 | Human | NInv-LOD | III | ST17                        |                                                 | G11-Tn5801 | 51        | ERS337468 | PRJEB4456 |
| CC17 | NEM318       | France                | 1995 | Human | NInv-LOD | III | ST17                        | <i>tet</i> (M)                                  | G11-Tn5801 | 36        | ERS337504 | PRJEB4456 |
| CC17 | CCH210152823 | France                | 2010 | Human | Carriage | III | ST17                        | <i>tet</i> (M)                                  | G11-Tn5801 | 51        | ERS337482 | PRJEB4456 |
| CC17 | CCH206800353 | France                | 2006 | Human | NInv-LOD | III | ST17                        | <i>tet</i> (M)                                  | G11-Tn5801 | 51        | ERS337461 | PRJEB4456 |
| CC17 | CCH210800593 | France                | 2008 | Human | NInv-LOD | III | ST17                        | <i>tet</i> (M)                                  | G11-Tn5801 | 51        | ERS337490 | PRJEB4456 |
| CC17 | CCH209800918 | France                | 2009 | Human | NInv-LOD | III | ST17                        | <i>tet</i> (M)                                  | G11-Tn5801 | 101       | ERS337493 | PRJEB4456 |
| CC17 | Dakar IP-107 | C. A. F. <sup>§</sup> | 2007 | Human | Carriage | III | ST17                        | <i>tet</i> (M)                                  | G11-Tn5801 | 110       | ERS337532 | PRJEB4456 |
| CC17 | Bangui-IP-61 | C. A. F. <sup>§</sup> | 2007 | Human | Carriage | III | ST17                        | <i>tet</i> (M)                                  | G11-Tn5801 | 51        | ERS337525 | PRJEB4456 |
| CC17 | COH1         | USA                   |      | Human | InvD     | III | ST17                        | <i>tet</i> (M)                                  | G11-Tn5801 | Sanger    | HG939456  |           |
| CC17 | BE-NI-007    | Belgium               | 2010 | Human | Carriage | III | ST315-<br>like <sup>#</sup> | <i>tet</i> (M)                                  | G12-Tn916  | PE 2 x 75 | ERS039615 | ERP000746 |
| CC17 | DE-NI-0013   | Germany               | 2009 | Human | NInv-EOD | III | ST17-like <sup>#</sup>      | <i>tet</i> (M)                                  | G12-Tn916  | PE 2 x 75 | ERS039655 | ERP000746 |

Supplementary Table 1

|      |                  |                       |       |        |          |     |                             |                |           |           |           |           |
|------|------------------|-----------------------|-------|--------|----------|-----|-----------------------------|----------------|-----------|-----------|-----------|-----------|
| CC17 | DE-NI-0017       | Germany               | 2009  | Human  | NInv-EOD | III | ST17-like <sup>#</sup>      | <i>tet</i> (M) | G12-Tn916 | PE 2 x 75 | ERS039657 | ERP000746 |
| CC17 | DE-NI-0019       | Germany               | 2009  | Human  | NInv-EOD | III | ST17-like <sup>#</sup>      | <i>tet</i> (M) | G12-Tn916 | PE 2 x 75 | ERS039658 | ERP000746 |
| CC17 | B96P             | Australia             | 2008  | Human  | Carriage | III | ST17                        | <i>tet</i> (M) | G12-Tn916 | PE 2 x 75 | ERS046927 | ERP000746 |
| CC17 | B96V             | Australia             | 2008  | Human  | Carriage | III | ST17                        | <i>tet</i> (M) | G12-Tn916 | PE 2 x 75 | ERS046932 | ERP000746 |
| CC17 | CCH210169294     | France                | 2010  | Human  | Carriage | III | ST17                        | <i>tet</i> (M) | G12-Tn916 | 51        | ERS337486 | PRJEB4456 |
| CC17 | CCH209800160     | France                | 2009  | Human  | NInv-LOD | III | ST17                        | <i>tet</i> (M) | G12-Tn916 | 51        | ERS337473 | PRJEB4456 |
| CC17 | CCH210126535     | France                | 2010  | Human  | Carriage | III | ST17                        | <i>tet</i> (M) | G12-Tn916 | 51        | ERS337479 | PRJEB4456 |
| CC17 | CCH208800481     | France                | 2008  | Human  | NInv-LOD | III | ST17                        | <i>tet</i> (M) | G12-Tn916 | 51        | ERS337470 | PRJEB4456 |
| CC17 | CCH210155112     | France                | 2010  | Human  | Carriage | III | ST17                        | <i>tet</i> (M) | G12-Tn916 | 51        | ERS337483 | PRJEB4456 |
| CC17 | CCH209800039     | France                | 2009  | Human  | NInv-LOD | III | ST17                        | <i>tet</i> (M) | G12-Tn916 | 51        | ERS337472 | PRJEB4456 |
| CC17 | CCH207800343     | France                | 2007  | Human  | NInv-LOD | III | ST17                        | <i>tet</i> (M) | G12-Tn916 | 51        | ERS337465 | PRJEB4456 |
| CC17 | CRBIP22.120      | France                | 1961  | Human  | InvD     | III | ST17-like <sup>#</sup>      | <i>tet</i> (M) | G12-Tn916 | PE 2 x 75 | ERS337494 | ERP000746 |
| CC17 | BM110            | USA                   | <1989 | Human  | Ninv     | III | ST17                        | <i>tet</i> (M) | G12-Tn916 | 50        | ERS337464 | PRJEB4456 |
| CC17 | Madagascar-IP-33 | Madagascar            | 2006  | Human  | NA       | III | ST17-like <sup>#</sup>      | <i>tet</i> (M) | G12-Tn916 | 51        | ERS337500 | PRJEB4456 |
| CC17 | CRBIP22.94       | France                | 1955  | Human  | NA       | III | ST17                        | <i>tet</i> (M) | G12-Tn916 | 51        | ERS337495 | PRJEB4456 |
| CC17 | CCH210107206     | France                | 2010  | Human  | Carriage | III | ST17                        | <i>tet</i> (M) | G12-Tn916 | 51        | ERS337477 | PRJEB4456 |
| CC17 | CCH209801071     | France                | 2009  | Human  | NInv-LOD | III | ST17-like <sup>#</sup>      | <i>tet</i> (M) | G12-Tn916 | 51        | ERS337476 | PRJEB4456 |
| CC17 | CRBIP22.98       | France                | 1955  | Human  | NA       | III | ST17                        | <i>tet</i> (M) | G12-Tn916 | 51        | ERS337496 | PRJEB4456 |
| CC17 | WC3/UK21         | UK                    | 2001  | Human  | NInv-EOD | III | ST17                        | <i>tet</i> (M) | G12-Tn916 | 36        | ERS337507 | PRJEB4456 |
| CC17 | Dakar-IP-8       | Senegal               | 2007  | Human  | Carriage | III | ST17                        | <i>tet</i> (M) | G12-Tn916 | 51        | ERS337534 | PRJEB4456 |
| CC17 | CZ183            | Czech republic        |       | Animal | Bovine   | III | ST355-like <sup>#</sup>     | <i>tet</i> (M) | G12-Tn916 | 36        | ERS337497 | PRJEB4456 |
| CC17 | NEM1857          | France                | 2001  | Human  | NInv-LOD | III | ST252-like <sup>&amp;</sup> | <i>tet</i> (M) | G13-Tn916 | 51        | ERS337503 | PRJEB4456 |
| CC17 | CCH210172343     | France                | 2010  | Human  | Carriage | III | ST17                        | <i>tet</i> (M) | G13-Tn916 | 51        | ERS337487 | PRJEB4456 |
| CC17 | CCH210800140     | France                | 2010  | Human  | NInv-LOD | III | ST17                        | <i>tet</i> (M) | G13-Tn916 | 51        | ERS337489 | PRJEB4456 |
| CC17 | Dakar-IP-98      | Senegal               | 2007  | Human  | Carriage | III | ST17                        | <i>tet</i> (M) | G13-Tn916 | 51        | ERS337498 | PRJEB4456 |
| CC17 | Bangui-IP-29     | C. A. F. <sup>5</sup> | 2007  | Human  | Carriage | III | ST17                        | <i>tet</i> (M) | G13-Tn916 | 110       | ERS337523 | PRJEB4456 |
| CC17 | Madagascar-IP-84 | Madagascar            | 2007  | Human  | Carriage | III | ST17                        | <i>tet</i> (M) | G13-Tn916 | 51        | ERS337502 | PRJEB4456 |

Supplementary Table 1

|      |                  |                       |      |       |                |     |                             |                                      |            |           |           |           |
|------|------------------|-----------------------|------|-------|----------------|-----|-----------------------------|--------------------------------------|------------|-----------|-----------|-----------|
| CC17 | CCH210145919     | France                | 2010 | Human | Carriage       | III | ST17                        | <i>tet(M)</i>                        | G14-Tn916  | 51        | ERS337480 | PRJEB4456 |
| CC17 | Madagascar-IP-71 | Madagascar            | 2007 | Human | Carriage       | III | ST17-like <sup>#</sup>      | <i>tet(M)</i>                        | G14-Tn916  | 51        | ERS337501 | PRJEB4456 |
| CC17 | Bangui-IP-112    | C. A. F. <sup>5</sup> | 2007 | Human | Carriage       | III | ST17                        | <i>tet(M)</i>                        | G15-Tn916  | 51        | ERS337522 | PRJEB4456 |
| CC17 | Madagascar-IP-20 | Madagascar            | 2006 | Human | NA             | IV  | ST291                       | <i>tet(M)</i>                        | G16-Tn5801 | 101       | ERS337499 | PRJEB4456 |
| CC17 | CCH211800247     | France                | 2011 | Human | Alnv arthritis | IV  | ST291                       | <i>tet(M)</i>                        | G16-Tn5801 | 101       | ERS337541 | PRJEB4456 |
| CC17 | CCH209800361     | France                | 2009 | Human | AlnvD          | IV  | ST291                       | <i>tet(M)</i>                        | G16-Tn5801 | 101       | ERS337474 | PRJEB4456 |
| CC17 | Spain-82         | Spain                 | 2005 | Human | NA             | IV  | ST291                       | <i>tet(M)</i>                        | G16-Tn5801 | 101       | ERS337506 | PRJEB4456 |
| CC17 | CCH211800398     | France                | 2011 | Human | Carriage       | IV  | ST291                       | <i>tet(M)</i>                        | G16-Tn5801 | 101       | ERS337492 | PRJEB4456 |
| CC19 | DK-NI-010        | Denmark               | 2009 | Human | NInv-EOD       | III | ST19                        | <i>tet(M)</i>                        | G17-Tn916  | PE 2 x 75 | ERS039625 | ERP000746 |
| CC19 | DK-NI-011        | Denmark               | 2009 | Human | NCarriage      | III | ST19-like <sup>#</sup><br>& | <i>tet(M)</i>                        | G17-Tn916  | PE 2 x 75 | ERS039626 | ERP000746 |
| CC19 | DE-NI-007        | Germany               | 2008 | Human | NInv-EOD       | III | ST19                        | <i>erm(B) aadE<br/>aphA3 sta cat</i> | G17-Tn916  | PE 2 x 75 | ERS039652 | ERP000746 |
| CC19 | BG-NI-012        | Bulgaria              | 2010 | Human | NInv-EOD       | III | ST19                        | <i>tet(M) erm(TR)<br/>spcR</i>       | G17-Tn916  | PE 2 x 75 | ERS039645 | ERP000746 |
| CC19 | CZ-NI-002        | Czech Republic        | 2008 | Human | NCarriage      | III | ST19                        | <i>tet(M)</i>                        | G17-Tn916  | PE 2 x 75 | ERS039683 | ERP000746 |
| CC19 | CZ-NI-003        | Czech Republic        | 2008 | Human | NCarriage      | III | ST19                        | <i>tet(M)</i>                        | G17-Tn916  | PE 2 x 75 | ERS039684 | ERP000746 |
| CC19 | DE-NI-042        | Germany               | 2010 | Human | NInv-EOD       | III | ST19-like <sup>#</sup><br>& | <i>tet(M)</i>                        | G17-Tn916  | PE 2 x 75 | ERS039666 | ERP000746 |
| CC19 | GB-NI-007        | Great Britain         | 2010 | Human | NInv-EOD       | III | ST19                        | <i>tet(M)</i>                        | G17-Tn916  | PE 2 x 75 | ERS039702 | ERP000746 |
| CC19 | GB-NI-015        | Great Britain         | 2010 | Human | NInv-EOD       | III | ST19-like <sup>#</sup><br>& | <i>tet(O) Isa(C)</i>                 | G17-Tn916  | PE 2 x 75 | ERS039707 | ERP000746 |
| CC19 | RBH01            | Australia             | 2008 | Human | Carriage       | III | ST19                        | <i>tet(M)</i>                        | G17-Tn916  | PE 2 x 75 | ERS046916 | ERP000746 |
| CC19 | RBH03            | Australia             | 2008 | Human | Carriage       | III | ST19                        | <i>tet(M)</i>                        | G17-Tn916  | PE 2 x 75 | ERS046918 | ERP000746 |
| CC19 | RBH04            | Australia             | 2008 | Human | Carriage       | III | ST19                        | <i>tet(M)</i>                        | G17-Tn916  | PE 2 x 75 | ERS046919 | ERP000746 |
| CC19 | RBH11            | Australia             | 2008 | Human | Carriage       | III | ST19                        | <i>tet(M)</i>                        | G17-Tn916  | PE 2 x 75 | ERS046925 | ERP000746 |
| CC19 | B37VS            | Australia             | 2008 | Human | Carriage       | III | ST335                       | <i>tet(M) erm(TR)<br/>spcR</i>       | G17-Tn916  | PE 2 x 75 | ERS046908 | ERP000746 |
| CC19 | B68VD            | Australia             | 2008 | Human | Carriage       | III | ST19-like <sup>#</sup><br>& | <i>tet(M)</i>                        | G17-Tn916  | PE 2 x 75 | ERS046911 | ERP000746 |
| CC19 | CCH211800615     | France                | 2011 | Human | Carriage       | III | ST19                        | <i>tet(O) InuB aadE</i>              | G17-Tn916  | 110       | ERS337441 | PRJEB4456 |

Supplementary Table 1

|      |                  |                       |      |        |           |     |                             |                                                        |            |           |           |           |
|------|------------------|-----------------------|------|--------|-----------|-----|-----------------------------|--------------------------------------------------------|------------|-----------|-----------|-----------|
| CC19 | Bangui-IP-11     | C. A. F. <sup>§</sup> | 2006 | Human  | NA        | III | ST182                       | <i>tet(M)</i>                                          | G17-Tn916  | 110       | ERS337439 | PRJEB4456 |
| CC19 | Spain-54         | Spain                 | 2005 | Animal | Milk      | V   | ST19                        | <i>tet(M)</i>                                          | G17-Tn916  | 51        | ERS337449 | PRJEB4456 |
| CC19 | Dakar-IP-26      | Senegal               | 2007 | Human  | Carriage  | III | ST19-like <sup>&amp;</sup>  | <i>tet(M)</i>                                          | G17-Tn916  | 51        | ERS337533 | PRJEB4456 |
| CC19 | CCH206800172     | France                | 2006 | Human  | InvD      | III | ST19                        | <i>tet(M) Isa(C)<br/>erm(B) aadE<br/>aphA3 sta cat</i> | G17-Tn916  | 110       | ERS337527 | PRJEB4456 |
| CC19 | GB-NI-011        | Great Britain         | 2010 | Human  | NCarriage | III | ST19                        | <i>tet(M)</i>                                          | G18-Tn916  | PE 2 x 75 | ERS039705 | ERP000746 |
| CC19 | RBH12            | Australia             | 2008 | Human  | Carriage  | III | ST19                        | <i>tet(M)</i>                                          | G18-Tn916  | PE 2 x 75 | ERS046926 | ERP000746 |
| CC19 | CCH208800962     | France                | 2008 | Human  | AlnvD     | III | ST19                        | <i>tet(O) erm(B)</i>                                   | G18-Tn916  | 110       | ERS337531 | PRJEB4456 |
| CC19 | CCH208800734     | France                | 2008 | Human  | AlnvD     | III | ST19                        | <i>tet(M)</i>                                          | G18-Tn916  | 110       | ERS337530 | PRJEB4456 |
| CC19 | Spain-77         | Spain                 | 2005 | Human  | Carriage  | III | ST19                        | <i>tet(M)</i>                                          | G19-Tn916  | 51        | ERS337450 | PRJEB4456 |
| CC19 | CZ-NI-014        | Czech Republic        | 2009 | Human  | NInv-EOD  | II  | ST479-like <sup>#</sup>     | <i>tet(M)</i>                                          | G20-Tn916  | PE 2 x 75 | ERS039693 | ERP000746 |
| CC19 | Bangui-IP-79     | C. A. F. <sup>§</sup> | 2006 | Human  | NA        | II  | ST28                        | <i>tet(M)</i>                                          | G20-Tn916  | 110       | ERS337444 | PRJEB4456 |
| CC19 | BG-NI-009        | Bulgaria              | 2008 | Human  | NCarriage | II  | ST28-like <sup>#</sup><br>& | <i>tet(M)</i>                                          | G21-Tn916  | PE 2 x 75 | ERS039642 | ERP000746 |
| CC19 | B24VD            | Australia             | 2008 | Human  | Carriage  | II  | ST28                        | <i>tet(M)</i>                                          | G21-Tn916  | PE 2 x 75 | ERS046907 | ERP000746 |
| CC19 | Madagascar-IP-66 | Madagascar            | 2006 | Human  | NA        | II  | ST28                        | <i>tet(M)</i>                                          | G21-Tn916  | 51        | ERS337448 | PRJEB4456 |
| CC19 | DK-NI-009        | Denmark               | 2009 | Human  | NCarriage | II  | ST28                        | <i>tet(M)</i>                                          | G22-Tn916  | PE 2 x 75 | ERS039624 | ERP000746 |
| CC19 | CRBIP22.109      | France                | 1959 | Human  | InvD      | II  | ST28                        |                                                        |            | 110       | ERS337445 | PRJEB4456 |
| CC19 | B81VD            | Australia             | 2008 | Human  | Carriage  | III | ST106                       | <i>erm(B) aadE<br/>aphA3 sta</i>                       |            | PE 2 x 75 | ERS046930 | ERP000746 |
| CC19 | 023_13           | France                | 1969 | Goat   | NA        | III | ST19                        |                                                        |            | 51        | ERS337440 | PRJEB4456 |
| CC19 | CRBIP22.108      | France                | 1958 | Human  | Carriage  | III | ST19                        |                                                        |            | 110       | ERS337443 | PRJEB4456 |
| CC19 | CRBIP22.103      | USA                   | 1956 | Human  | NA        | II  | ST19                        |                                                        |            | 51        | ERS337442 | PRJEB4456 |
| CC19 | DE-NI-041        | Germany               | 2008 | Human  | NInv-EOD  | III | ST106                       | <i>tet(O)</i>                                          |            | PE 2 x 75 | ERS039665 | ERP000746 |
| CC19 | CRBIP22.117      | France                | 1960 | Human  | NA        | Ia  | ST19                        | <i>tet(O)</i>                                          |            | 110       | ERS337446 | PRJEB4456 |
| CC19 | CRBIP22.118      | Denmark               | 1960 | Human  | Urine     | III | ST19                        | <i>tet(O)</i>                                          |            | 110       | ERS337447 | PRJEB4456 |
| CC23 | BE-NI-001        | Belgium               | 2009 | Human  | Carriage  | Ia  | ST23-like <sup>#</sup>      | <i>tet(M)</i>                                          | G23-Tn5801 | PE 2 x 75 | ERS039613 | ERP000746 |
| CC23 | DK-NI-005        | Denmark               | 2009 | Human  | NInv-EOD  | Ia  | ST23-like <sup>#</sup>      | <i>tet(M)</i>                                          | G23-Tn5801 | PE 2 x 75 | ERS039621 | ERP000746 |

Supplementary Table 1

|      |                  |                       |       |        |                 |     |                         |                                   |            |           |           |           |
|------|------------------|-----------------------|-------|--------|-----------------|-----|-------------------------|-----------------------------------|------------|-----------|-----------|-----------|
| CC23 | BG-NI-004        | Bulgaria              | 2010  | Human  | NCarriage       | Ia  | ST23-like <sup>#</sup>  | <i>tet(M)</i>                     | G23-Tn5801 | PE 2 x 75 | ERS039638 | ERP000746 |
| CC23 | DE-NI-014        | Germany               | 2009  | Human  | NInv-EOD        | Ia  | ST23-like <sup>#</sup>  | <i>tet(M)</i>                     | G23-Tn5801 | PE 2 x 75 | ERS039656 | ERP000746 |
| CC23 | BG-NI-005        | Bulgaria              | 2009  | Human  | NInv-EOD        | Ia  | ST23-like <sup>#</sup>  | <i>tet(M)</i>                     | G23-Tn5801 | PE 2 x 75 | ERS039639 | ERP000746 |
| CC23 | DE-NI-033        | Germany               | 2010  | Human  | NInv-EOD        | Ia  | ST23-like <sup>#</sup>  | <i>tet(M) tet(M) erm(TR) spcR</i> | G23-Tn5801 | PE 2 x 75 | ERS039661 | ERP000746 |
| CC23 | DE-NI-040        | Germany               | 2010  | Human  | NInv-EOD        | Ia  | ST23-like <sup>#</sup>  | <i>tet(M) mefE</i>                | G23-Tn5801 | PE 2 x 75 | ERS039664 | ERP000746 |
| CC23 | GB-NI-006        | Great Britain         | 2010  | Human  | NInv-EOD        | Ia  | ST23                    | <i>tet(M)</i>                     | G23-Tn5801 | PE 2 x 75 | ERS039701 | ERP000746 |
| CC23 | CZ-NI-005        | Czech Republic        | 2008  | Human  | NCarriage       | Ia  | ST23-like <sup>#</sup>  | <i>tet(M)</i>                     | G23-Tn5801 | PE 2 x 75 | ERS039686 | ERP000746 |
| CC23 | RBH08            | Australia             | 2008  | Human  | Carriage        | Ia  | ST23                    | <i>tet(M) erm(TR)</i>             | G23-Tn5801 | PE 2 x 75 | ERS046923 | ERP000746 |
| CC23 | B50VS            | Australia             | 2008  | Human  | Carriage        | Ia  | ST24                    | <i>tet(M)</i>                     | G23-Tn5801 | PE 2 x 75 | ERS046929 | ERP000746 |
| CC23 | B81VS            | Australia             | 2008  | Human  | Carriage        | Ia  | ST23                    | <i>tet(M)</i>                     | G23-Tn5801 | PE 2 x 75 | ERS046931 | ERP000746 |
| CC23 | B50VD            | Australia             | 2008  | Human  | Carriage        | Ia  | ST23                    | <i>tet(M)</i>                     | G23-Tn5801 | PE 2 x 75 | ERS046910 | ERP000746 |
| CC23 | Madagascar-IP-7  | Madagascar            | 2006  | Human  | NA              | Ia  | ST23                    | <i>tet(M)</i>                     | G23-Tn5801 | 51        | ERS337519 | PRJEB4456 |
| CC23 | CCH210801006     | Canada                | 2010  | Human  | Carriage        | Ia  | ST23                    | <i>tet(M) Isa(C)</i>              | G23-Tn5801 | 110       | ERS337511 | PRJEB4456 |
| CC23 | CCH263           | France                | 1998  | Human  | Urine           | Ia  | ST23                    | <i>tet(M) tet(L)</i>              | G23-Tn5801 | 51        | ERS337512 | PRJEB4456 |
| CC23 | NEM1002          | France                | 1996  | Human  | NInv-EOD        | Ia  | ST23                    | <i>tet(M)</i>                     | G23-Tn5801 | 51        | ERS337521 | PRJEB4456 |
| CC23 | Bangui-IP-6      | C. A. F. <sup>§</sup> | 2006  | Human  | NA              | Ia  | ST23                    | <i>tet(M)</i>                     | G23-Tn5801 | 51        | ERS337510 | PRJEB4456 |
| CC23 | BG-NI-001        | Bulgaria              | 2009  | Human  | NCarriage       | Ia  | ST144-like <sup>#</sup> | <i>tet(M)</i>                     | G24-Tn916  | PE 2 x 75 | ERS039635 | ERP000746 |
| CC23 | DK-NI-002        | Denmark               | 2009  | Human  | NInv-EOD        | V   | ST23                    | <i>tet(M)</i>                     | G24-Tn916  | PE 2 x 75 | ERS039618 | ERP000746 |
| CC23 | DE-NI-006        | Germany               | 2008  | Human  | NInv-EOD        | Ia  | ST144-like <sup>#</sup> | <i>tet(M)</i>                     | G24-Tn916  | PE 2 x 75 | ERS039651 | ERP000746 |
| CC23 | CZ-NI-001        | Czech Republic        | 2008  | Human  | NCarriage       | Ia  | ST23-like <sup>#</sup>  |                                   | G24-Tn916  | PE 2 x 75 | ERS039682 | ERP000746 |
| CC23 | RBH07            | Australia             | 2008  | Human  | Carriage        | Ia  | ST23                    | <i>tet(M) aadE aphA3 sta</i>      | G24-Tn916  | PE 2 x 75 | ERS046922 | ERP000746 |
| CC23 | 928662           | Germany               | >2002 | Animal | Dog             | Ia  | ST23                    | <i>tet(M)</i>                     | G24-Tn916  | 51        | ERS337508 | PRJEB4456 |
| CC23 | Madagascar-IP-79 | Madagascar            | 2006  | Human  | NA              | V   | ST23                    | <i>tet(M)</i>                     | G24-Tn916  | 36        | ERS337520 | PRJEB4456 |
| CC23 | Madagascar-IP-11 | Madagascar            | 2006  | Human  | NA              | V   | ST23                    | <i>tet(M)</i>                     | G24-Tn916  | 51        | ERS337518 | PRJEB4456 |
| CC23 | 501_19           | France                |       | Animal | Bovine Mastitis | III | ST23                    | <i>tet(M)</i>                     | G25-Tn5801 | 51        | ERS337509 | PRJEB4456 |

Supplementary Table 1

|      |                  |                       |      |        |                 |     |                               |                            |            |           |           |           |
|------|------------------|-----------------------|------|--------|-----------------|-----|-------------------------------|----------------------------|------------|-----------|-----------|-----------|
| CC23 | CRBIP22.90       | France                | 1953 | Human  | InvD            | Ia  | ST23                          | <i>tet(M)</i>              | G26-Tn5801 | 51        | ERS337516 | PRJEB4456 |
| CC23 | DK-NI-016        | Denmark               | 2010 | Human  | NCarriage       | Ia  | ST88-like <sup>#</sup>        |                            |            | PE 2 x 75 | ERS039631 | ERP000746 |
| CC23 | DE-NI-012        | Germany               | 2009 | Human  | NInv-EOD        | Ia  | ST88-like <sup>#</sup>        |                            |            | PE 2 x 75 | ERS039654 | ERP000746 |
| CC23 | B42VD            | Australia             | 2008 | Human  | Carriage        | III | ST23-like <sup>#</sup>        |                            |            | PE 2 x 75 | ERS046909 | ERP000746 |
| CC23 | CRBIP22.110      | France                | 1959 | Human  | Carriage        | Ia  | ST23                          |                            |            | 51        | ERS337514 | PRJEB4456 |
| CC23 | CCH350           | France                | 2005 | Human  | AInvD           | III | ST380                         |                            |            | 51        | ERS337513 | PRJEB4456 |
| CC23 | CRBIP22.97       | France                | 1953 | Human  | InvD            | Ia  | ST23                          |                            |            | 51        | ERS337517 | PRJEB4456 |
| CC23 | CRBIP22.113      | France                | 1959 | Human  | InvD            | Ia  | ST23                          |                            |            | 51        | ERS337515 | PRJEB4456 |
| CC23 | DK-NI-014        | Denmark               | 2009 | Human  | NCarriage       | Ia  | ST88-like <sup>#</sup>        | <i>tet(O)</i>              |            | PE 2 x 75 | ERS039629 | ERP000746 |
| CC26 | Bangui-IP-105    | C. A. F. <sup>S</sup> | 2006 | Human  | Carriage        | V   | ST26                          | <i>tet(M) tet(L)</i>       | G27-Tn916  | 51        | ERS337537 | PRJEB4456 |
| CC26 | Dakar-IP-30      | Senegal               | 2006 | Human  | Carriage        | V   | ST26                          | <i>tet(M)</i>              | G27-Tn916  | 36        | ERS337539 | PRJEB4456 |
| CC26 | Bangui-IP-84     | C. A. F. <sup>S</sup> | 2006 | Human  | Carriage        | V   | ST26                          | <i>tet(M) tet(L)</i>       | G27-Tn916  | 51        | ERS337538 | PRJEB4456 |
| CC26 | IT-NI-036        | Italy                 | 2010 | Human  | NInv-EOD        | V   | ST26-like <sup>#</sup>        | <i>tet(M) erm(TR) spcR</i> | G28-Tn916  | PE 2 x 75 | ERS039680 | ERP000746 |
| CC26 | IT-NI-037        | Italy                 | 2010 | Human  | NInv-EOD        | V   | ST26-like <sup>#</sup>        | <i>tet(M) erm(TR) spcR</i> | G28-Tn916  | PE 2 x 75 | ERS039681 | ERP000746 |
| CC26 | 39_07            | Malaysia              | 1971 | Bovine | Bovine Milk     | V   | ST26                          |                            |            | 51        | ERS337536 | PRJEB4456 |
|      | IT-NI-003        | Italy                 | 2008 | Human  | NInv-EOD        | III | ST496-like <sup>#</sup>       | <i>tet(M)</i>              | Tn5801     | PE 2 x 75 | ERS039667 | ERP000746 |
|      | Madagascar-IP-37 | Madagascar            | 2007 | Human  | Carriage        | Ia  | ST314                         | <i>tet(M)</i>              | Tn5801     | 110       | ERS337545 | PRJEB4456 |
|      | CCH298           | France                | 2005 | Human  | Urine           | Ia  | ST248-like <sup>#</sup>       | <i>tet(M)</i>              | Tn5801     | 51        | ERS337543 | PRJEB4456 |
|      | GB-NI-014        | Great Britain         | 2008 | Human  | NInv-EOD        | II  | ST22-like <sup>#</sup>        | <i>tet(M)</i>              | G29-Tn916  | PE 2 x 75 | ERS039706 | ERP000746 |
|      | RBH06            | Australia             | 2008 | Human  | Carriage        | II  | ST22                          | <i>tet(M)</i>              | G29-Tn916  | PE 2 x 75 | ERS046921 | ERP000746 |
|      | 2584             | France                | 1987 | Bovine | Bovine mastitis | Ia  | ST420-like <sup>#-&amp;</sup> | <i>tet(M) Isa(C)</i>       | Tn916      | 36        | ERS337463 | PRJEB4456 |
|      | Madagascar-IP-43 | Madagascar            | 2007 | Human  | Carriage        | Ia  | ST103                         | <i>tet(M)</i>              | Tn916      | 51        | ERS337546 | PRJEB4456 |
|      | IT-NI-016        | Italy                 | 2009 | Human  | NInv-EOD        | IX  | ST130-like <sup>#</sup>       |                            |            | PE 2 x 75 | ERS039671 | ERP000746 |
|      | GB-NI-002        | Great Britain         | 2009 | Human  | NInv-EOD        | IX  | ST130-like <sup>#</sup>       |                            |            | PE 2 x 75 | ERS039697 | ERP000746 |

Supplementary Table 1

|  |                     |         |      |        |                 |    |               |  |  |    |           |           |
|--|---------------------|---------|------|--------|-----------------|----|---------------|--|--|----|-----------|-----------|
|  | ni1122              | France  | 1985 | Bovine | Bovine mastitis | II | ST418         |  |  | 36 | ERS337505 | PRJEB4456 |
|  | 443_26              | Germany | 1971 | Bovine | Bovine Mastitis | Ia | ST7           |  |  | 36 | ERS337540 | PRJEB4456 |
|  | Spain-IP-30         | Spain   | 2005 | Bovine | Bovine Milk     | II | ST415-489like |  |  | 51 | ERS337548 | PRJEB4456 |
|  | SS1219 <sup>1</sup> | Israel  | 1994 | Fish   | NA              | Ib | ST261         |  |  |    |           |           |

# One of the seven alleles was in two contigs in the assembly; <sup>§</sup>Central African Republic; <sup>&</sup> Differs from the ST by a single SNP in one of the seven alleles; <sup>§</sup>NA: not available; InvD: invasive disease; NInv: neonatal invasive disease; EOD: early-onset disease; LOD: late onset disease; NCarriage: Neonatal carriage; AInv: adult invasive disease  
 1 Rosinski-Chupin I, *et al.* Reductive evolution in *Streptococcus agalactiae* and the emergence of a host adapted lineage. *BMC Genomics* **14**, 252 (2013).
